# Supplementary material for: Low-molecular-mass iron in healthy blood plasma is not predominately ferric citrate
Source: Royal Society of Chemistry journal article supplement (doi:10.1039/c8mt00055g), 2018-01-01

### Electronic Supplemental Information

Dziuba et al. Low-Molecular-Mass Iron in Healthy Blood Plasma is not predominately Ferric Citrate

Figure S1: LC-ICP-MS traces of Fe<sup>III</sup> citrate run at different iron: citrate ratios and different mobile phase pH. All traces are of ferric citrate standard solutions which contained 1 μM Fe and various concentrations of citrate. A and D, 10 mM citrate; B, E, and F, 1 mM citrate; C and G, 10 μM citrate. Mobile phase pH is indicated.

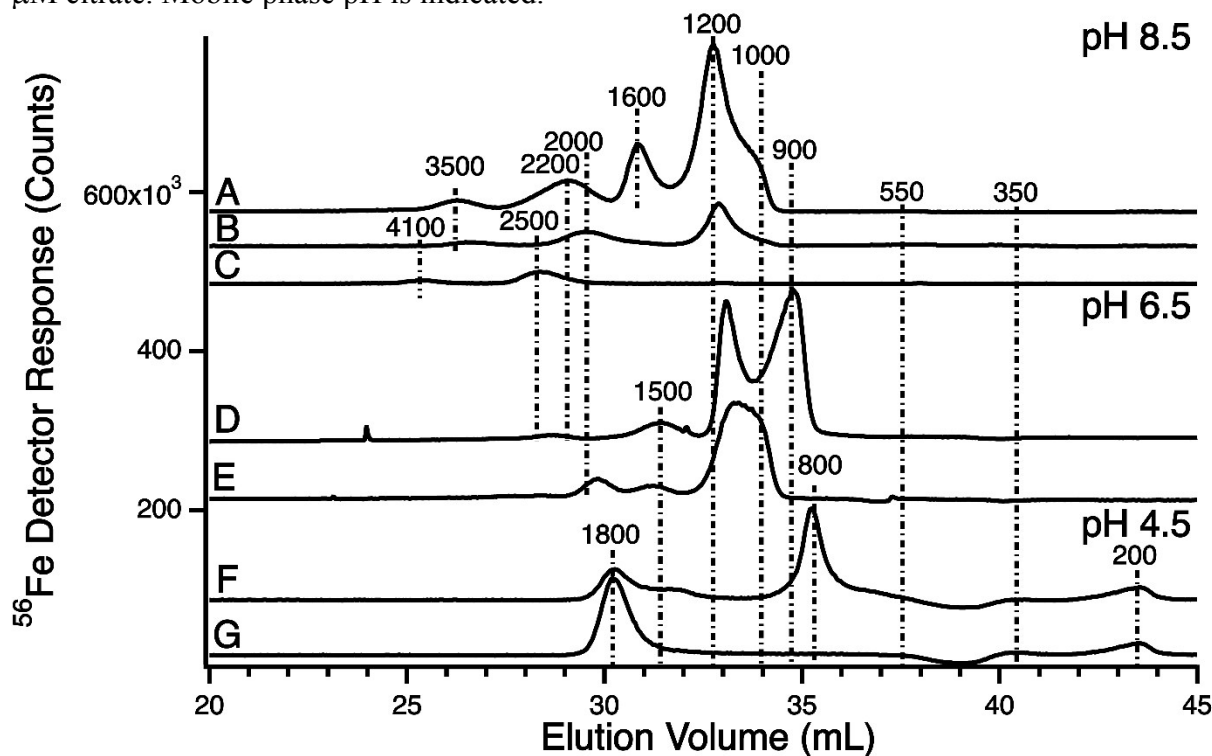

Supplement: c8mt00055g1.pdf [file c8mt00055g1.pdf]
